# Supplementary material for: Retrospective cell lineage reconstruction in Humans using short tandem repeats
Source: bioRxiv or medRxiv preprint supplement (doi:10.1101/191296), 2020-10-19
Supplement: Supplementary file [file 191296-1.pdf]

**Supplemental Information:**

**Summary of STRs target genotyping protocols**

| Tissue                 | DNA   | Target Enrichment | Calling Method             | Majority STR Type | Targets       | Purpose             | Refs                                             |
|------------------------|-------|-------------------|----------------------------|-------------------|---------------|---------------------|--------------------------------------------------|
| human blood            | Bulk  | multiplex PCR     | Capillary Electrophoresis  | hexa-             | ~20           | Forensic            | CODIS(Bruce Budowle)                             |
| Human                  | Bulk  | Array capture     | Next Generation Sequencing | all types         | 7851          | Mutation Discovery  | Guilmatre <i>et al</i> (Guilmatre et al. 2013)   |
| human blood            | Bulk  | RNA Probes        | Next Generation Sequencing | tri- and longer   | 10764         | Mutation Discovery  | Jorge Duitama <i>et al</i> (Duitama et al. 2014) |
| A.thaliana             | Bulk  | MIPs              | Next Generation Sequencing | tri- and hexa-    | 102           | Evolution phylogeny | Carlson <i>et al</i> (Carlson et al. 2015)       |
| human leukemia         | scWGA | multiplex PCR     | Capillary Electrophoresis  | di-               | 128           | Lineage Discovery   | Shlush <i>et al</i> (Shlush et al. 2012)         |
| human cancer           | scWGA | Access Array      | Next Generation Sequencing | di-               | ~2000         | Lineage Discovery   | Biezuner <i>et al</i> (Biezuner et al. 2016)     |
| human cancer or normal | scWGA | duplex MIPs       | Next Generation Sequencing | di- and mono-     | 12473 ~50,000 | Lineage Discovery   | (current study)                                  |

**Supplemental Table1.** STR capture methods summary

Entity relation diagram (ERD) of the cell lineage database structure, a full super high resolution figure is in supplemental file4.

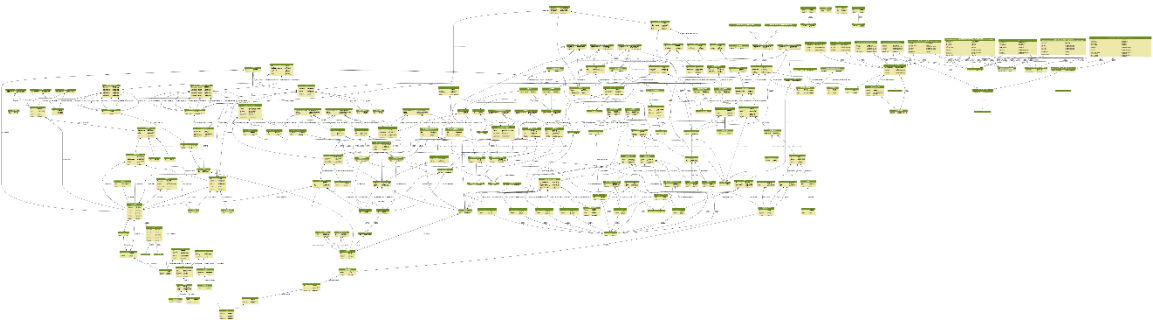

Supplemental Figure1.Entity relation diagram (ERD) of the cell lineage database structure.

The scalability of duplex MIPs

The cost trend of duplex MIPs pipeline and Access Array pipeline while scaling up.

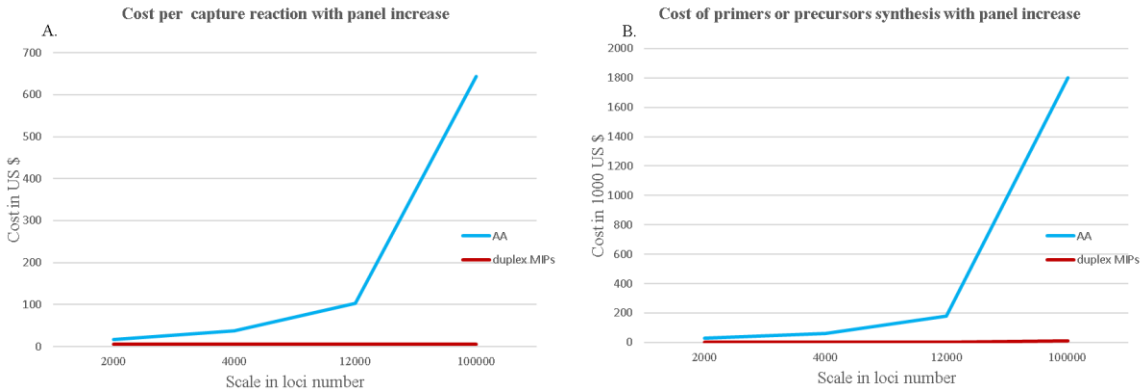

Supplemental Figure2. Cost and Scalability between Access Array and duplex MIPs

**General cost of duplex MIPs capture pipeline was listed below.**

The synthesis cost of duplex MIPs pipeline is ~2,200\$ for 12,000 loci panel compared with over 30,000\$ for 2000 AA primer pairs. Duplex MIPs capture reaction per cell is ~2.33\$, while the AA reaction cost per cell is ~19.69\$.

| Reagents                                     | Cat.No                | Cost(\$) | Total Volume(ul or reactions) | Volume per Reaction (ul) | Cost per Reaction (\$) |
|----------------------------------------------|-----------------------|----------|-------------------------------|--------------------------|------------------------|
| duplex MIPs                                  | Home made             | 2200     | 9400000                       | 1                        | 0.000234043            |
| Betaine solution 5M                          | B0306 1VL Sigma       | 49       | 1500                          | 4                        | 0.13                   |
| Phusion High-Fidelity DNA Polymerase         | NEB-M0530L            | 424      | 250                           | 0.4                      | 0.68                   |
| Ampligase 10X Reaction Buffer                | A1905B EPICENTRE      | 66       | 5000                          | 2                        | 0.03                   |
| Ampligase DNA Ligase W/O Buffer              | A3210K EPICENTRE      | 693      | 2000                          | 1                        | 0.35                   |
| Exonuclease I (E.coli)                       | NEB-M0293L            | 268      | 750                           | 0.175                    | 0.06                   |
| Exonuclease III (E.coli)                     | NEB-M0206L            | 236      | 250                           | 0.18                     | 0.17                   |
| RecJf                                        | NEB-M0264L            | 272      | 167                           | 0.1                      | 0.16                   |
| Exonuclease T - 1,250 units, T7              | NEB-M0265L            | 280      | 250                           | 0.08                     | 0.09                   |
| Exonuclease Lambda                           | NEB-M0263L            | 248      | 500                           | 0.4                      | 0.20                   |
| Exonuclease                                  | M0262L                | 268      | 1000                          | 0.02                     | 0.01                   |
| NEBNext Ultra II Q5 MasterMix                | NEB-M0544L            | 395      | 12500                         | 10                       | 0.32                   |
| MinElute PCR Purification Kit                | QIAGEN 28006          | 594      | 250reactions                  | 2reaction/Run            | 0.02                   |
| Qubit® dsDNA HS Assay Kit,                   | Q32854                | 269      | 500reactions                  | 2reaction/Run            | 0.01                   |
| Agencourt Ampure XP Beads                    | BeckmanCoulter A63881 | 1485     | 600000                        | 16                       | 0.04                   |
| 2% Agarose, dye-free, BluePippin, 100 - 600, | BDF2010               | 475      | 50reactions                   | 1reaction/Run            | 0.05                   |
| TapeStation Screen Tap                       | 5067-5582             | 211      | 112 reactions                 | 2reaction/Run            | 0.02                   |
| TapeStation Reagents                         | 5067-5583             | 90.33    | 112 reactions                 | 2reaction/Run            | 0.01                   |
| <b>Cost per Cell</b>                         |                       |          |                               |                          | <b>2.33</b>            |

**Supplemental Table 2.** The cost of duplex MIPs capture pipeline. The cost was calculated by 200 cells/run, WGA cost and sequencing run cost were not included.

**Cost comparison between duplex MIPs pipeline and Access Array pipeline**

The sequencing cost per cell per 1000 loci is 0.012\$ in duplex MIPs pipeline vs 0.016\$ in AA pipeline. In total, the cost per cell is ~35.6\$ for 12,000 loci with duplex MIPs platform compared to 39.4\$ per cell for 2000 loci in AA pipeline.

| Name                                   | duplex MIPs for 12,000 loci(\$) | Access Array for 2,000 loci(\$) |
|----------------------------------------|---------------------------------|---------------------------------|
| WGA Cost per cell                      | 4.26                            | 4.26                            |
| Target Enrichment cost per cell        | 2.330032758                     | 19.69                           |
| Sequencing cost per cell per 1000 loci | 0.0120833                       | 0.0160625                       |
| Total Cost per cell                    | 35.59003276                     | 39.37                           |
| Initial Cost*                          | 8523.33                         | 32762.95                        |

**Supplemental Table 3.** Cost comparison between duplex MIPs pipeline and Access Array pipeline.

Initial Cost\* including primers or duplex MIPs precursors synthesis, targeting enrichment reagents

**The amplification cycles comparison between Access Array pipeline and duplex MIPs platform**

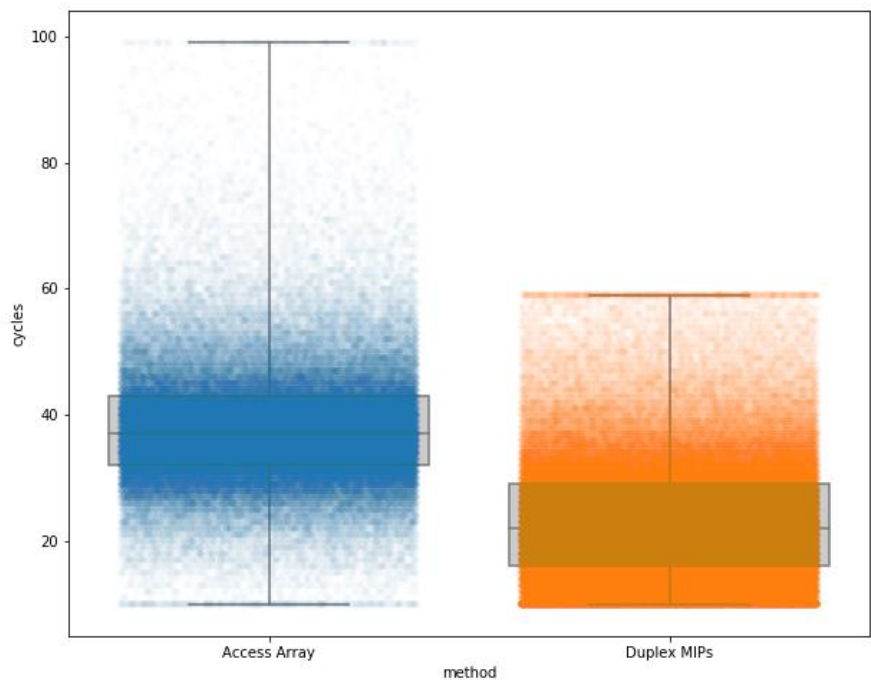

**Supplemental Figure3.** The amplification cycles comparison between Access Array pipeline and duplex MIPs platform

#### Scale-up test at 25K and 50K panel

| Barcodecontent ID | Total Reads | Success Read | Success Rate | # Loci (>=1X) | Panel Name | Template | Panel Size |
|-------------------|-------------|--------------|--------------|---------------|------------|----------|------------|
| 11094             | 83946       | 64784        | 77.2%        | 15425         | OM9        | Hela     | 50K        |
| 11098             | 86039       | 66589        | 77.4%        | 15531         | OM9        | Hela     | 50K        |
| 11102             | 46          | 9            | 19.6%        | 9             | OM9        | DDW      | 50K        |
| 11730             | 205862      | 163105       | 79.2%        | 13784         | OM6+OM8    | Hela     | 25K        |
| 11731             | 189982      | 140744       | 74.1%        | 13312         | OM6+OM8    | Hela     | 25K        |
| 11732             | 184         | 12           | 6.5%         | 12            | OM6+OM8    | DDW      | 25K        |

**Supplemental Table4.** 25K and 50K panel test

#### The combination of two independent panel OM6 and OM8

To test the feasibility of combine two independent panel of duplex MIPs, an independent panel of duplex MIPs OM8 (Supplemental File3), no shared targets between OM8 and OM6, was prepared and tested with OM6. 8 nM OM6 and 8 nM OM8 were pooled by 1:1 and used to capture in a single reaction with a modified protocol where 59.7 °C was used as Hyb and Gap steps instead of 56 °C.

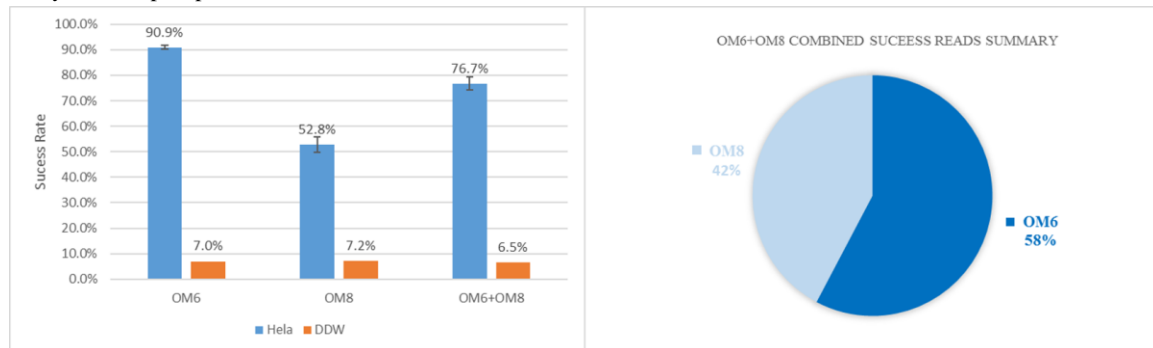

**Supplemental Figure4.** The combination of two independent panel OM6 and OM8 | Hela bar for OM6 is average value of two replicates. Hela bar for OM8 is average value of three replicates. OM6+OM8 bar is average value of two replicates. DDW is negative control, no replicates. Pie chart is average value of two OM6+OM8 replicates value

**An example of Unique Molecular Identifier (UMI) read counts in the MiseqR33**

Samples from MiseqR33 was analyzed. All 64 different UMIs were detected in all the samples. The sample with barcodes number 743 from MiseqR33 was shown as an example. The reads mapping to their reference targets were collected and UMIs were counted by reads contained this UMI. Counts ranking from high to low by UMI compositions was shown in Sup. Fig2.

The counts of UMI bases of this sample: 'T': 17658, 'A': 11363, 'G': 10063, 'C': 8060, 'N': 28, biased towards 'T'.

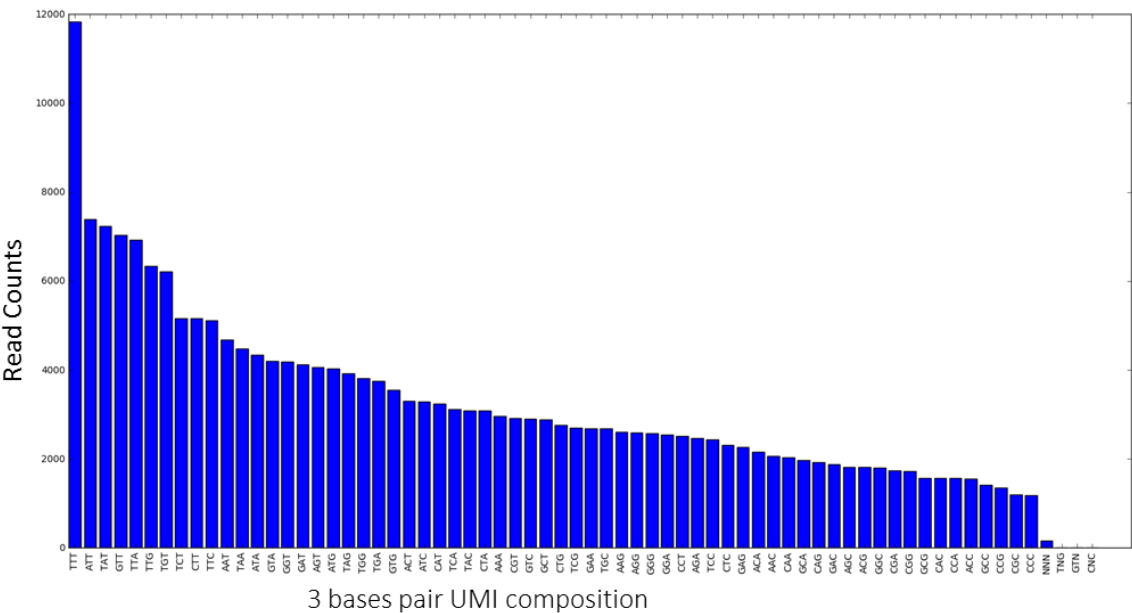

**Supplemental Figure5.** An example of UMI read counts in the MiseqR33.

**Duplex MIPs workflow timeline**

The whole workflow of duplex MIPs pipeline took 5days from hybridization to data analysis, with roughly 3-hour hands on time.

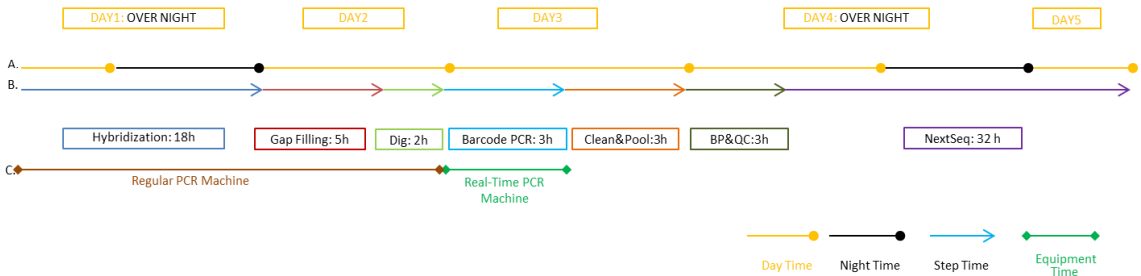

**Supplemental Figure6.** Duplex MIPs workflow timeline (A). Day counts (B). Reaction step time count (C). Machine time count

**List of major reagents using in duplex MIPs pipeline**

| Reagents                                    | Catalog #                |
|---------------------------------------------|--------------------------|
| KOD Hot Start DNA Polymerase                | Merck 71086              |
| dNTP 25mM each                              | Bioline BIO-39053        |
| Betaine solution 5M                         | Sigma B0306 1VL          |
| Phusion High-Fidelity DNA Polymerase        | NEB M0530L               |
| Ampligase 10X Reaction Buffer 5ml           | EPICENTRE A1905B         |
| Ampligase DNA Ligase W/O Buffer             | EPICENTRE A3210K         |
| Exonuclease I (E.coli) - 15,000 units       | NEB M0293L               |
| Exonuclease III (E.coli) - 25000 units      | NEB M0206L 1             |
| RecJf - 1,000 units                         | NEB M0264S               |
| Exonuclease T - 1,250 units                 | NEB M0265L               |
| T7 Exonuclease - 5,000 units                | NEB M0263L               |
| Lambda Exonuclease                          | EPICENTRE LEO32K         |
| NEBNext Ultra II Q5 Master Mix              | NEB M0544S               |
| MinElute PCR Purification Kit (250)         | QIAGEN 28006             |
| Qubit® dsDNA HS Assay Kit                   | Life Technologies Q32854 |
| Agencourt Ampure XP Beads                   | Beckman Coulter A63881   |
| 2% Agarose, dye-free, w/ internal standards | Sage Science ES-BDF2003  |
| SYBR Green I                                | Lonza 50513              |

**Supplemental Table5.** List of major reagents using in duplex MIPs pipeline

### Quality control step used in duplex MIPs preparation.

The size of duplex MIPs precursor is ~150bp. Duplex MIPs precursors were first amplified by 30 cycle PCR and further digested by MlyI (NEB) in order to create a ready-to-run duplex MIPs. Expected size for precursor amplification product is ~150bp and following digestion, the size of ready-to-run duplex MIPs is ~105bp.

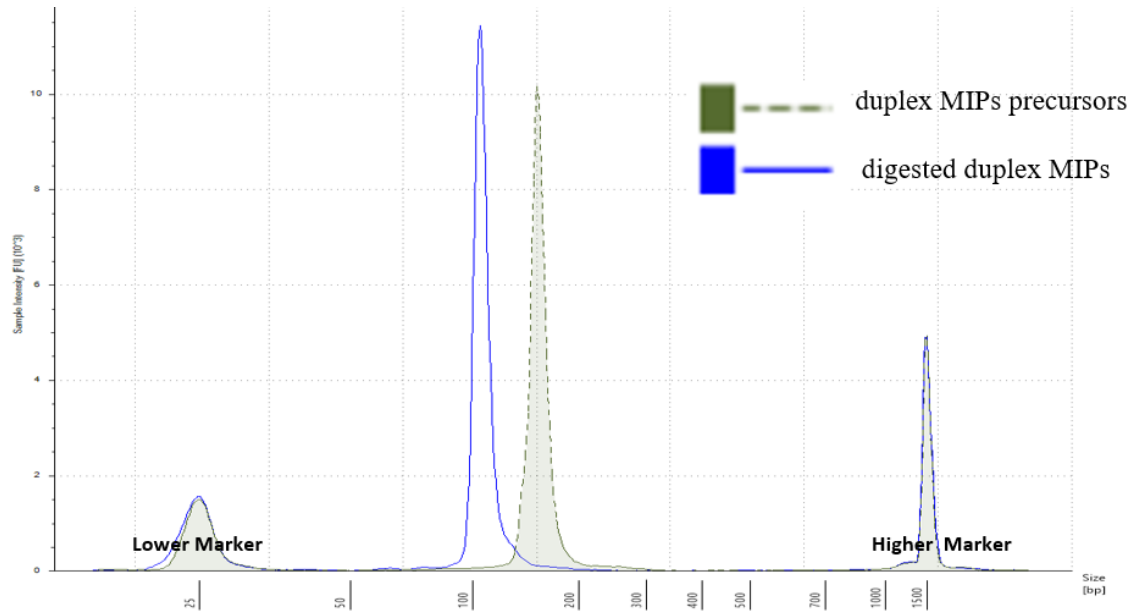

**Supplemental Figure7.** The size of duplex MIPs precursor and the digested duplex MIPs | The dashed green peak in the middle is duplex MIPs precursors; the solid blue peak in the middle is duplex MIPs.

### The calibration of duplex MIPs pipeline.

Three major steps: hybridization, gap-filling, digestion in the MIPs capture pipeline were calibrated in 18 different conditions. Hybridization were tested in 2, 4, 18 hours; Gap filling were tested in 1, 2, 4 hours; while the Digestion in 1, 2 hours (Data from MiseqR31, MiseqR32, and MiseqR33).

| Probe Type | DNA  | Hyb(hr) | Gap(hr) | Dig(hr) | Total Reads | Total Success | Success Rate | Loci>0 | Loci>4 | Loci>9 |
|------------|------|---------|---------|---------|-------------|---------------|--------------|--------|--------|--------|
| OM6        | Hela | 2       | 1       | 1       | 91805       | 18568         | 20%          | 6568   | 854    | 121    |
| OM6        | Hela | 2       | 1       | 1       | 115167      | 23632         | 21%          | 7293   | 1322   | 243    |
| OM6        | Hela | 2       | 1       | 2       | 121728      | 71250         | 59%          | 8892   | 4125   | 1770   |
| OM6        | Hela | 2       | 1       | 2       | 114540      | 71036         | 62%          | 9229   | 4508   | 1960   |
| OM6        | Hela | 2       | 2       | 1       | 199923      | 39214         | 20%          | 8365   | 2536   | 694    |
| OM6        | Hela | 2       | 2       | 1       | 195185      | 79740         | 41%          | 9451   | 4911   | 2267   |
| OM6        | Hela | 2       | 2       | 2       | 100563      | 56274         | 56%          | 8787   | 3641   | 1337   |
| OM6        | Hela | 2       | 2       | 2       | 88212       | 51594         | 58%          | 8605   | 3247   | 1098   |
| OM6        | Hela | 2       | 4       | 1       | 151143      | 48412         | 32%          | 8854   | 3198   | 997    |
| OM6        | Hela | 2       | 4       | 1       | 141481      | 45520         | 32%          | 8390   | 3000   | 902    |
| OM6        | Hela | 2       | 4       | 2       | 157111      | 84307         | 54%          | 9506   | 5147   | 2480   |
| OM6        | Hela | 2       | 4       | 2       | 129168      | 88406         | 68%          | 9498   | 5333   | 2611   |
| OM6        | Hela | 4       | 1       | 1       | 212479      | 111956        | 53%          | 10162  | 6138   | 3348   |
| OM6        | Hela | 4       | 1       | 1       | 234372      | 133546        | 57%          | 10269  | 6808   | 4101   |
| OM6        | Hela | 4       | 1       | 2       | 129933      | 52523         | 40%          | 8995   | 3295   | 1127   |
| OM6        | Hela | 4       | 1       | 2       | 141878      | 62774         | 44%          | 9369   | 4097   | 1566   |
| OM6        | Hela | 4       | 2       | 1       | 291192      | 151906        | 52%          | 10468  | 7360   | 4635   |
| OM6        | Hela | 4       | 2       | 1       | 261932      | 154769        | 59%          | 10503  | 7442   | 4729   |
| OM6        | Hela | 4       | 2       | 2       | 2279390     | 960410        | 42%          | 8474   | 8086   | 7674   |
| OM6        | Hela | 4       | 2       | 2       | 158861      | 119662        | 75%          | 10064  | 6275   | 3624   |
| OM6        | Hela | 4       | 4       | 1       | 258732      | 93063         | 36%          | 10062  | 5689   | 2785   |
| OM6        | Hela | 4       | 4       | 1       | 175854      | 107480        | 61%          | 10156  | 6287   | 3512   |
| OM6        | Hela | 4       | 4       | 2       | 207550      | 156801        | 76%          | 10395  | 7339   | 4781   |
| OM6        | Hela | 4       | 4       | 2       | 146975      | 112963        | 77%          | 10028  | 6267   | 3519   |
| OM6        | Hela | 18      | 1       | 1       | 108935      | 75979         | 70%          | 9946   | 5124   | 2297   |
| OM6        | Hela | 18      | 1       | 1       | 281556      | 218901        | 78%          | 10831  | 8540   | 6092   |
| OM6        | Hela | 18      | 1       | 2       | 229945      | 82983         | 36%          | 9935   | 5247   | 2571   |
| OM6        | Hela | 18      | 1       | 2       | 161878      | 80571         | 50%          | 9948   | 5148   | 2376   |
| OM6        | Hela | 18      | 2       | 1       | 112089      | 80908         | 72%          | 10092  | 5458   | 2587   |
| OM6        | Hela | 18      | 2       | 1       | 191178      | 154354        | 81%          | 10649  | 7833   | 5016   |
| OM6        | Hela | 18      | 2       | 2       | 97018       | 39422         | 41%          | 8628   | 2692   | 893    |
| OM6        | Hela | 18      | 2       | 2       | 111756      | 57099         | 51%          | 9508   | 4006   | 1576   |
| OM6        | Hela | 18      | 4       | 1       | 105243      | 87278         | 83%          | 10100  | 5780   | 2814   |
| OM6        | Hela | 18      | 4       | 1       | 240644      | 200976        | 84%          | 10795  | 8679   | 6224   |
| OM6        | Hela | 18      | 4       | 2       | 223929      | 95769         | 43%          | 10204  | 6009   | 3099   |
| OM6        | Hela | 18      | 4       | 2       | 183300      | 145216        | 79%          | 10607  | 7781   | 4816   |

**Supplemental Table6.** Calibration of duplex MIPs process: Hyb -Gap-Dig | Hyb means hybridization, the first step in duplex MIPs capture protocol. Gap means gap filing, the second step. Dig is the third step, linear DNA digestion. Green

highlighted the protocol we chosen as standard. The success rate calculated as mapped reads/total reads. The loci captured defined as loci that has at least one mapped read.

**Calibration of Sequencing Library Size Selection**

| BluePippin Size (bp) | Name          | Total Reads | Total Success | Success Rate | Loci >0 |
|----------------------|---------------|-------------|---------------|--------------|---------|
| 300                  | W151020 p2-C9 | 61816       | 57226         | 92.6%        | 7944    |
| 240-340              | W151020 p2-C9 | 144518      | 130517        | 90.3%        | 9783    |
| 270-310              | W151020 p2-C9 | 87924       | 82158         | 93.4%        | 8791    |
| 300                  | H1- 090215-B3 | 87665       | 83768         | 95.6%        | 3075    |
| 240-340              | H1- 090215-B3 | 164359      | 155680        | 94.7%        | 4046    |
| 270-310              | H1- 090215-B3 | 122252      | 117106        | 95.8%        | 3574    |
| 300                  | H1- 090215-B3 | 85631       | 81251         | 94.9%        | 2891    |
| 240-340              | H1- 090215-B3 | 178585      | 168311        | 94.2%        | 3985    |
| 270-310              | H1- 090215-B3 | 123557      | 117945        | 95.5%        | 3411    |
| 300                  | H1- 090215-B6 | 129546      | 123914        | 95.7%        | 5568    |
| 240-340              | H1- 090215-B6 | 387493      | 368533        | 95.1%        | 6850    |
| 270-310              | H1- 090215-B6 | 213020      | 203982        | 95.8%        | 6209    |
| 300                  | H1- 090215-E9 | 114190      | 109002        | 95.5%        | 5194    |
| 240-340              | H1- 090215-E9 | 460648      | 436100        | 94.7%        | 6728    |
| 270-310              | H1- 090215-E9 | 137124      | 131168        | 95.7%        | 5569    |
| 300                  | H1- 090215-A1 | 77196       | 73307         | 95.0%        | 5230    |
| 240-340              | H1- 090215-A1 | 154987      | 146026        | 94.2%        | 6327    |
| 270-310              | H1- 090215-A1 | 120505      | 114812        | 95.3%        | 5882    |
| 300                  | H1- 090215-F5 | 14620       | 13535         | 92.6%        | 3706    |
| 240-340              | H1- 090215-F5 | 184932      | 170304        | 92.1%        | 7744    |
| 270-310              | H1- 090215-F5 | 22392       | 20930         | 93.5%        | 4533    |
| 300                  | PC2           | 12488       | 11149         | 89.3%        | 5004    |
| 240-340              | PC2           | 95192       | 81596         | 85.7%        | 10347   |
| 270-310              | PC2           | 9078        | 8208          | 90.4%        | 4454    |

**Supplemental Table7.** Calibration of Sequencing Library Size Selection | PC2 was bulk DNA; all the other samples were single cell WGA DNA

**Efficiency comparison between different duplex MIPs: template ratio**

Considered the yield of single cell WGA reaction, we decided to use 8nM MIPs and 250ng to 500 ng single cell WGA DNA as the template DNA for our standard protocol. This combination is corresponding to a ratio ~70:1 duplex MIPs to DNA template.

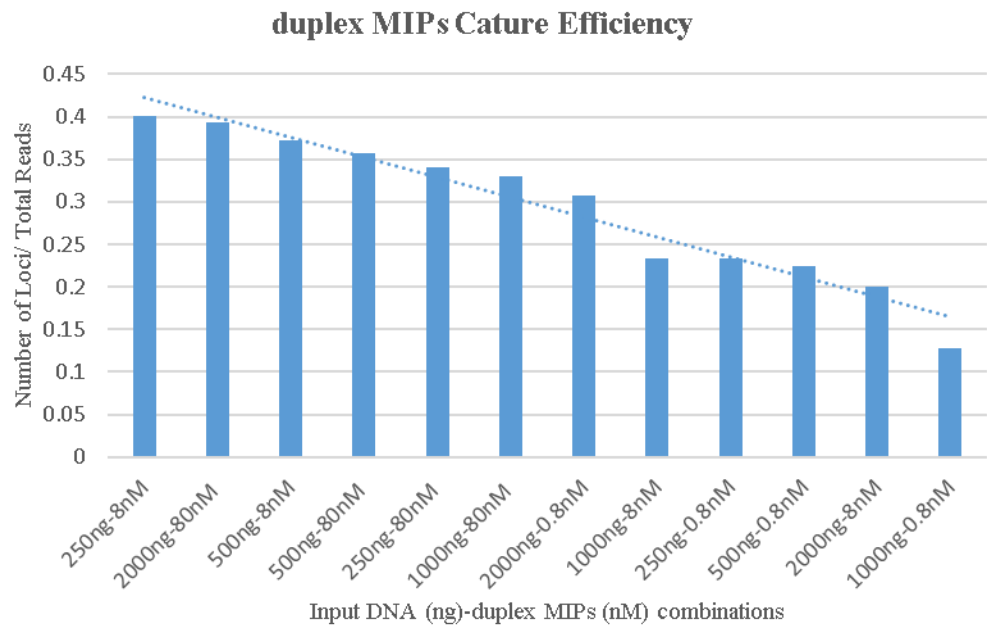

**Supplemental Figure8.** Efficiency comparison between different probes: template ratio | Efficiency was calculated by captured loci/ total reads. Average value of two replicates for each test was used in the figure.

### Sequencing library quality control

As a sequencing library quality control step, TapeStation was applied to the libraries before and after Blue Pippin. 240bp~340bp range size selection setting was used on 2% V1 cassette. Two side-product peaks were removed by BluePippin as shown below.

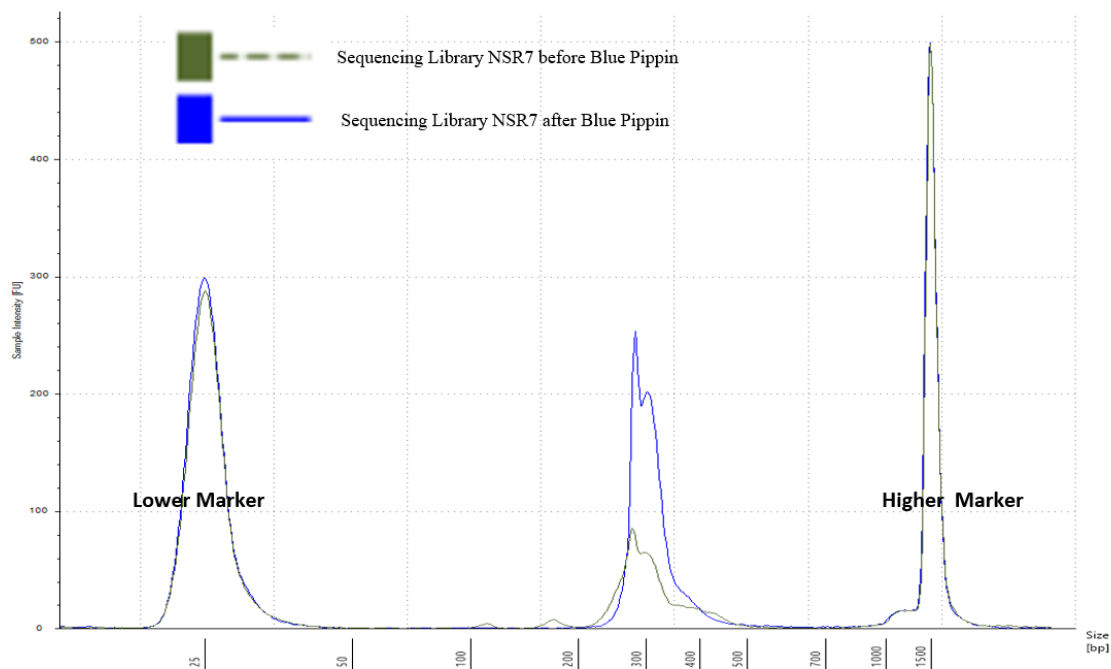

**Supplemental Figure9.** Library Quality Control: Tape Station before Blue Pippin and after Blue Pippin

### A schematic diagram of the computational pipeline

A new mapping strategy was replaced the one in our previous work(Biezuner et al. 2016). Reads were aligned against a custom reference genome of all possible STR variations in the panel. This improved the computing efficiency. All the source code was available in <https://github.com/ofirr/clineage>

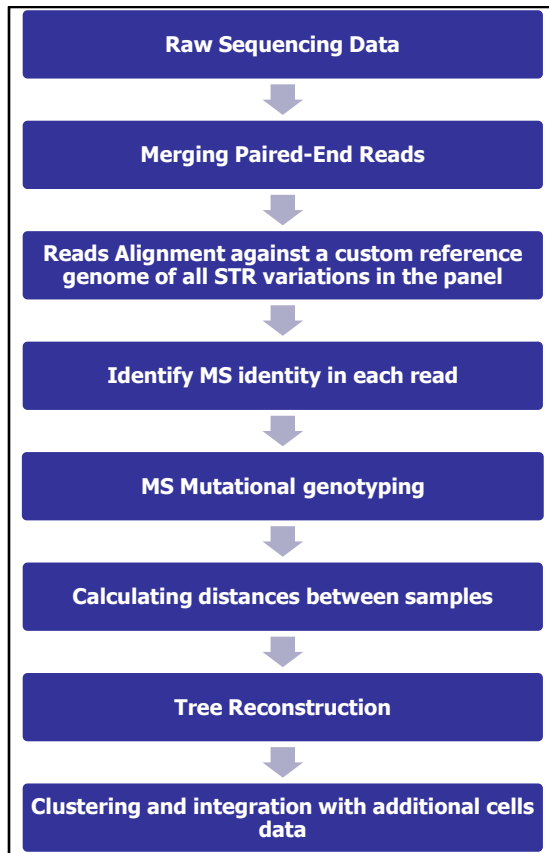

**Supplemental Figure10.**

A schematic diagram of the computational pipeline

Sampling documentation user interface

Individuals

Sampling events

Samples

Separation events

Cells/Bulks

Plates

Each individual (e.g. patient, mouse...) is documented with some basic background.

Add Individual

▼ Filters

Name

HH:MM

HH:MM

| Name                   | Taxa         | Sex | Born                | Comment                                                                                                     | Background       | Location                     | Sacrificed |
|------------------------|--------------|-----|---------------------|-------------------------------------------------------------------------------------------------------------|------------------|------------------------------|------------|
| 795-09                 | Homo sapiens | F   | [no data]           | Primary breast tumor                                                                                        | Cancer patient   | Germany                      | [no data]  |
| MM16-412               | Homo sapiens | M   | [no data]           | lymph node resection after diagnosed malignant melanoma                                                     | Melanoma patient | Germany                      | [no data]  |
| cell line P53          | Homo sapiens | M   | [no data]           |                                                                                                             | [no data]        | [no data]                    | [no data]  |
| Healthy donor - F      | Homo sapiens | F   | [no data]           |                                                                                                             | Healthy          | Rambam Medical Center, Haifa | [no data]  |
| IMR-90_072017_weizmann | Homo sapiens | F   | [no data]           |                                                                                                             | Caucassican      | Weizmann Ins                 | [no data]  |
| MM16-DSS-Check         | Homo sapiens | M   | [no data]           | lymph node resection after diagnosed malignant melanoma                                                     | Melanoma patient | Germany                      | [no data]  |
| U937 052017_Weizmann   | Homo sapiens | M   | [no data]           |                                                                                                             | Leukemic patient | Weizmann Ins                 | [no data]  |
| Healthy donor          | Homo sapiens | M   | [no data]           |                                                                                                             | Healthy          | Rambam Medical Center, Haifa | [no data]  |
| U937 042017_Rambam     | Homo sapiens | M   | [no data]           | Cell Line                                                                                                   | Leukemic patient | Rambam Medical Center, Haifa | [no data]  |
| MM16-423               | Homo sapiens | M   | [no data]           | lymph node resection after diagnosed malignant melanoma Chair of experimental medicine and therapy research | Melanoma patient | Germany                      | [no data]  |
| TP53 bulk DNA          | Homo sapiens | F   | [no data]           | CLL Patient Gender unknown                                                                                  | Leukemic patient | Rambam Medical Center, Haifa | [no data]  |
| IDH1 / DNMT3a bulk DNA | Homo sapiens | F   | 1939-05-02 00:00:00 | IDH1 / DNMT3a                                                                                               | Leukemic patient | Rambam Medical Center, Haifa | [no data]  |
| IDH2 bulk DNA          | Homo sapiens | F   | 1951-09-23 00:00:00 | NPM1 /IDH2                                                                                                  | Leukemic patient | Rambam Medical Center, Haifa | [no data]  |
| FLT3-ITD/NPM1          |              |     | 1943-04-04          |                                                                                                             |                  | Rambam Medical               |            |

Supplemental Figure11. Individual

Individuals

Sampling events

Samples

Separation events

Cells/Bulks

Plates

Each individual (e.g. patient, mouse...) is documented with some basic background.

Add Individual

▼ Filters

Name

Name

Taxa

|                                      |         |
|--------------------------------------|---------|
|                                      |         |
| H1-ex vivo seeding started 12/1/2015 | Homo sa |
| LCL15                                | Homo sa |
| AA control-mouse                     | Mus mus |
| MD4954                               | Mus mus |
| MD4953                               | Mus mus |

Individual editing form

Taxa: Homo sapiens

Name: YUCLAT

Sex: Male

Born:

Received from Ruth Halaban

Comment:

Background:

Location: Yale

Sacrificed:

Partner: RuthHalaban

OK

Cancel

| round     | Location                                     | Sacrificed          |
|-----------|----------------------------------------------|---------------------|
|           | Rivka's fridge No1. Meyer building           | 2015-01-12 00:00:00 |
| D-, NPM1- | Rambam Medical Center, Haifa                 | [no data]           |
|           | Rivka's fridge No1. Meyer building           | [no data]           |
| 5/Lgr5-ki | Hubrecht Institute, Utrecht, the Netherlands | 2013-12-04 00:00:00 |
| 5/Lgr5-ki | Hubrecht Institute, Utrecht, the Netherlands | 2013-04-12 00:00:00 |

|                         |              |   |                     |                                                       |                    |                |           |
|-------------------------|--------------|---|---------------------|-------------------------------------------------------|--------------------|----------------|-----------|
| YUCLAT                  | Homo sapiens | M | [no data]           | Received from Ruth Halaban                            | [no data]          | Yale           | [no data] |
| TCGA-06-0128            | Homo sapiens | M | 1944-01-01 00:00:00 |                                                       | [no data]          | [no data]      | [no data] |
| TCGA-06-0152            | Homo sapiens | M | 1946-01-01 00:00:00 | 68 y/o                                                | [no data]          | [no data]      | [no data] |
| donor ITEM-001          | Homo sapiens | M | [no data]           | Cristoph Klein                                        | [no data]          | [no data]      | [no data] |
| CW14                    | Homo sapiens | M | 1945-12-01 00:00:00 | Diagnosed for CLL on 9.7.2001                         | Caucassican        | Boston (DFCI)  | [no data] |
| 10448VPM                | Homo sapiens | M | [no data]           |                                                       | [no data]          | [no data]      | [no data] |
| AA control-Human        | Homo sapiens | M | [no data]           |                                                       | [no data]          | [no data]      | [no data] |
| Healthy patient - Liran | Homo sapiens | M | [no data]           | Healthy patient control for - Liran Shlush experiment | Wild type          | Totonto-Liran  | [no data] |
| 8056R - I Iran          | Homo sapiens | M | [no data]           | I Iran Shlush patient                                 | I leukemic patient | Totonto-I Iran | [no data] |

**Supplemental Figure12.** Individual editing form

| Individuals                                                                                   | Sampling events                         | Samples | Separation events   | Cells/Bulks | Plates       |
|-----------------------------------------------------------------------------------------------|-----------------------------------------|---------|---------------------|-------------|--------------|
| Add Plate                                                                                     |                                         |         |                     |             |              |
| <div> <div>Filters</div> <div> <div>Name</div> <div>State</div> <div>Type</div> </div> </div> |                                         |         |                     |             |              |
| Name                                                                                          | Type                                    | Barcode | Timestamp           | State       | Lastusedwell |
| AAR12                                                                                         | MPXs                                    |         | [no data]           |             | A01          |
| AAR13                                                                                         | MPXs                                    |         | [no data]           |             | A01          |
| AAR14                                                                                         | MPXs                                    |         | [no data]           |             | A01          |
| AAR15                                                                                         | MPXs                                    |         | [no data]           |             | A01          |
| AAR16                                                                                         | MPXs                                    |         | [no data]           |             | A01          |
| AAR17                                                                                         | MPXs                                    |         | [no data]           |             | A01          |
| AAR18                                                                                         | MPXs                                    |         | [no data]           |             | A01          |
| TCGA-06_Chaya                                                                                 | Full Skirted 96 well PCR plate (tetrad) |         | 2014-10-29 00:00:00 |             | A1           |
| MM_MPX_w/o_LB_P21                                                                             | MPXs                                    |         | [no data]           |             | B4           |
| Ruth Halaban YUTOGS Patient #1 02.11.14                                                       | Full Skirted 96 well PCR plate (tetrad) |         | 2014-11-02 00:00:00 |             | A1           |
| Ruth Halaban YUCLAT Patient #2 plate 1 02.11.14                                               | Full Skirted 96 well PCR plate (tetrad) |         | 2014-11-02 00:00:00 |             | A1           |
| Ruth Halaban YUCLAT Patient #2 plate 2 02.11.14                                               | Full Skirted 96 well PCR plate (tetrad) |         | 2014-11-02 00:00:00 |             | A1           |
| MM_MPX_w/o_LB_P22                                                                             | MPXs                                    |         | [no data]           |             | G1           |
| AAR19                                                                                         | MPXs                                    |         | [no data]           |             | A01          |
| AAR20                                                                                         | MPXs                                    |         | [no data]           |             | A01          |
| MM_MPX_w/o_LB_P25                                                                             | MPXs                                    |         | [no data]           |             | H3           |
| AAR21                                                                                         | MPXs                                    |         | [no data]           |             | F6           |
| United_hg19_Tail                                                                              | Primer pairs                            |         | [no data]           |             | A1           |

**Supplemental Figure13.** Plates

Individuals

Sampling events

Samples

Separation events

Cells/Bulks

Plates

Add Plate

▼ Filters

Name

State

Type

| Name                                            | Type                                    | Barcode | Timestamp           | State | Lastusedwell |
|-------------------------------------------------|-----------------------------------------|---------|---------------------|-------|--------------|
| AAR12                                           | MPXs                                    |         | [no data]           |       | A01          |
| AAR13                                           | MPXs                                    |         | [no data]           |       | A01          |
| AAR14                                           | MPXs                                    |         |                     |       | A01          |
| AAR15                                           | MPXs                                    |         |                     |       | A01          |
| AAR16                                           | MPXs                                    |         |                     |       | A01          |
| AAR17                                           | MPXs                                    |         |                     |       | A01          |
| AAR18                                           | MPXs                                    |         |                     |       | A01          |
| TCGA-06_Chaya                                   | Full Skirted 96 well PCR plate (tetrad) |         |                     |       | A1           |
| MM_MPX_w/o_LB_P21                               | MPXs                                    |         |                     |       | B4           |
| Ruth Halaban YUTOGS Patient #1 02.11.14         | Full Skirted 96 well PCR plate (tetrad) |         | 2014-11-02 00:00:00 |       | A1           |
| Ruth Halaban YUCLAT Patient #2 plate 1 02.11.14 | Full Skirted 96 well PCR plate (tetrad) |         | 2014-11-02 00:00:00 |       | A1           |
| Ruth Halaban YUCLAT Patient #2 plate 2 02.11.14 | Full Skirted 96 well PCR plate (tetrad) |         | 2014-11-02 00:00:00 |       | A1           |
| MM_MPX_w/o_LB_P22                               | MPXs                                    |         | [no data]           |       | G1           |
| AAR19                                           | MPXs                                    |         | [no data]           |       | A01          |
| AAR20                                           | MPXs                                    |         | [no data]           |       | A01          |
| MM_MPX_w/o_LB_P25                               | MPXs                                    |         | [no data]           |       | H3           |
| AAR21                                           | MPXs                                    |         | [no data]           |       | F6           |
| United_hg19_Tails_plt24                         | Primer pairs                            |         | [no data]           |       | A1           |

Plate editing form

Type: Full Skirted 96 well PCR plate (tetrad)

Name: Ruth Halaban YUCLAT Patient #2 plate 2

Barcode:

Timestamp: 2014-11-02

State:

Lastusedwell: A1

OK

Cancel

**Supplemental Figure14.** Plates editing form

Individuals

Sampling events

Samples

Separation events

Cells/Bulks

Plates

Extraction event (e.g. operation where tumor samples were taken, mouse was sacrificed and dissected...) this is not necessarily post-mortem.

Add extraction event

▼ Filters

Name

Extracted before date

HH:MM

Extracted after date

HH:MM

Extraction event location

individual's name

user who extracted

Comment

| Individual             | Name                 | User performed       | User documented | Date                | Location                     | Comment                                                                              |
|------------------------|----------------------|----------------------|-----------------|---------------------|------------------------------|--------------------------------------------------------------------------------------|
| MM16-423               | Blood                | ChristophKlein       | Veronika        | 2017-09-18 00:00:00 | Germany                      | leukapheresis product/ blood of malignant melanoma patient                           |
| MM16-412               | blood                | ChristophKlein       | Veronika        | 2017-03-08 00:00:00 | Germany                      | Chair of experimental medicine and therapy research blood of melanoma patient        |
| MM16-412               | metastasis           | ChristophKlein       | Veronika        | 2016-05-17 00:00:00 | Germany                      | metastasis from melanoma patient Chair of experimental medicine and therapy research |
| MM16-412               | lymph node           | ChristophKlein       | Veronika        | 2015-02-13 00:00:00 | Germany                      | lymph node resection after diagnosed malignant melanoma                              |
| MM16-412               | metastasis           | ChristophKlein       | Veronika        | 2017-05-17 00:00:00 | Germany                      | metastasis from melanoma patient                                                     |
| MM16-412               | metastasis           | ChristophKlein       | Veronika        | 2017-03-06 00:00:00 | Germany                      | metastasis from melanoma patient                                                     |
| MM16-412               | cell line            | ChristophKlein       | Veronika        | 2016-05-17 00:00:00 | Germany                      | Chair of experimental medicine and therapy research                                  |
| 795-09                 | 17/06/2016           | ChristophKlein       | Shiran          | 2016-06-17 00:00:00 | Germany                      | Blood from M1 patient                                                                |
| 795-09                 | 2009                 | ChristophKlein       | Shiran          | 2009-01-01 00:00:00 | Germany                      | Primary breast tumor Bone marrow isolation at primary surgery                        |
| MM16-412               | lymph node           | ChristophKlein       | Shiran          | 2016-05-17 00:00:00 | Germany                      | Chair of experimental medicine and therapy research                                  |
| Healthy donor - F      | DNA Peripheral Blood | ShlomitYehudaiReshef | Noa             | 2017-07-04 00:00:00 | Rambam Medical Center, Haifa |                                                                                      |
| IMR-90_072017_weizmann | IMR-90_16072017      | Shiran               | Shiran          | 2017-07-16 00:00:00 | Weizmann Ins                 |                                                                                      |

**Supplemental Figure15.**

## Sampling

Individuals

Sampling events

Samples

Separation events

Cells/Bulks

Plates

Extraction event (e.g. operation where tumor samples were taken, mouse was sacrificed and dissected...) this is not necessarily post-mortem.

Add extraction event

Filters

Name

Extraction event location

Individual

| Individual       | Name                              | Location | Comment |
|------------------|-----------------------------------|----------|---------|
| LCL15            | Diagnosis                         |          |         |
| AA control-mouse | blank                             |          |         |
| MD4954           | Second Extraction Event           |          |         |
| MD4954           | First Extraction Event            |          |         |
| MD4953           | Second Extraction Event           |          |         |
| MD4953           | First Extraction Event            |          |         |
| YUCLAT           | YUCLAT-SAT 09-887 - Metastasis 2  |          |         |
| YUCLAT           | YUCLAT 08-707 - Metastasis 1      |          |         |
| YUCLAT           | YUCLAT-AX 09-1058 - Metastasis 4  |          |         |
| YUCLAT           | YUCLAT 09-1008 - Metastasis 3     |          |         |
| YUCLAT           | YUCLAT 09-1182 - PBL              |          |         |
| YUTOGS           | YUTOGS 11-2073 - PBL              |          |         |
| YUTOGS           | YUTOGS-M.2 11-2216 - Metastasis 2 |          |         |
| YUTOGS           | YUTOGS 10-1897 - Metastasis 1     |          |         |
| TCGA-06-0128     | 1293                              |          |         |
| TCGA-06-0152     | unKnown                           |          |         |
| CW14             | Blood - ex                        |          |         |

Extraction event editing form

Individual:

YUCLAT

Name:

YUCLAT-AX 09-1058 - M

Comment:

p1 cells

Date:

2009-06-08 00:00:00

Location:

Yale

User performed:

root

User documented:

Noa

OK

Cancel

**Supplemental Figure16.**

**Sampling editing form**

Individuals

Sampling events

Samples

Separation events

Cells/Bulks

Plates

Samples extracted in said extracted event, these can range from or a simple blood test (documented once) up to multiple organs and multiple tissues sampled in the same autopsy (each documented separately and all referencing the same extraction operation). We currently record organ and tissue for these samples, both within this single hierarchical level.

Add extraction

▼ Filters

Name

extraction event

▼

Organ

▼

Tissue

▼

Comment

| Extraction event      | Name          | Organ       | Tissue      | Comment                                             |
|-----------------------|---------------|-------------|-------------|-----------------------------------------------------|
| MM14-23441>Separation | lymph node    | Lymph node  | none        | Chair of experimental medicine and therapy research |
| MM15-127>Lymph node   | LN            | Lymph node  | none        | Chair of experimental medicine and therapy research |
| MM16-423>Blood        | blood         | Blood       | Blood       | Chair of experimental medicine and therapy research |
| MM16-412>blood        | blood         | Blood       | Blood       | Chair of experimental medicine and therapy research |
| MM16-412>metastasis   | meta3         | Blood       | none        | metastasis of melanoma patient                      |
| MM16-412>metastasis   | meta2         | Blood       | none        |                                                     |
| MM16-412>metastasis   | meta1         | Blood       | Blood       |                                                     |
| MM16-412>lymph node   | LN            | Lymph node  | none        |                                                     |
| MM16-412>cell line    | cell line     | Cell line   | none        |                                                     |
| 795-09>17/06/2016     | blood         | Blood       | Blood       | Chair of experimental medicine and therapy research |
| 795-09>2009           | Bone marrow   | Bone Marrow | Bone marrow | Chair of experimental medicine and therapy research |
| 795-09>2009           | primary tumor | Breast      | none        | Chair of experimental medicine and therapy research |

**Supplemental Figure17.** Samples

Individuals

Sampling events

Samples

Separation events

Cells/Bulks

Plates

Samples extracted in said extracted event, these can range from or a simple blood test (documented once) up to multiple organs and multiple tissues sampled in the same autopsy (each documented separately and all referencing the same extraction operation). We currently record organ and tissue for these samples, both within this single hierarchical level.

Add extraction

▼ Filter

|       |  |
|-------|--|
| Na    |  |
| Tiss  |  |
| Extra |  |
| MD4   |  |
| Extra |  |
| MD4   |  |
| Extra |  |
| MD4   |  |
| Extra |  |
| MD4   |  |
| Extra |  |
| YUC   |  |
| SAT   |  |
| Meta  |  |
| YUC   |  |
| 08-7  |  |
| Meta  |  |

Extraction editing form

Extraction event: YUCLAT>YUCLAT-AX 09-1058 - Metastasis 4

Name: YUCLAT - Metastasis 4

Date:

Organ: Axilla

Tissue: Axilla

Comment:

p1 cells in DMSO.  
Metastasis to right axilla.

OK

Cancel

|                                         |                                         |          |          |                                                       |
|-----------------------------------------|-----------------------------------------|----------|----------|-------------------------------------------------------|
| YUCLAT>YUCLAT-AX 09-1058 - Metastasis 4 | YUCLAT - Metastasis 4                   | Axilla   | Axilla   | p1 cells in DMSO. Metastasis to right axilla.         |
| YUCLAT>YUCLAT 09-1008 -Metastasis 3     | YUCLAT - Metastasis 3                   | Scapular | Scapular | Tumor cells in DMSO. Recurrence right scapular region |
| YUCLAT>YUCLAT 09-1182 - PBL             | YUCLAT - PBL                            | Blood    | Blood    |                                                       |
| TCGA-06-0128>1 293                      | Spheroids (GSC's) of primary tumor 1293 | Brain    | Other    | Glioma                                                |
| TCGA-06-0128>1 293                      | Primary tumor                           | Brain    | Other    | Glioma                                                |
| TCGA-06-0152>u nKnown                   | Recurrent tumor of 516                  | Brain    | Other    | Glioma                                                |
| TCGA-06-0152>u nKnown                   | Spheroids (GSC's) of primary tumor 516  | Brain    | Other    |                                                       |

**Supplemental Figure18.** Extraction editing form

|             |                 |         |                   |             |        |
|-------------|-----------------|---------|-------------------|-------------|--------|
| Individuals | Sampling events | Samples | Separation events | Cells/Bulks | Plates |
|-------------|-----------------|---------|-------------------|-------------|--------|

Separation event - documenting the separation of said sample into individual single cells. This can be done via FACS, documenting the related markers, via Laser capture, documenting the related coordinates or via more random tissue separation protocols (documenting only the protocol).

[Add sampling event](#)
[Add FACS sampling event](#)
[Add Laser Capture sampling event](#)

▼ Filters

|                     |                    |
|---------------------|--------------------|
| Name                | Comment            |
| source extraction ▼ | user who sampled ▼ |

| Name                                | Extraction                       | Date                | User           | Comment                                                 |
|-------------------------------------|----------------------------------|---------------------|----------------|---------------------------------------------------------|
| gp100+ DCC                          | MM14-23441>Separation>lymph node | [no data]           | ChristophKlein | manual manipulation cryo-conserved adhesion slides      |
| CD31+ control cell                  | MM14-23441>Separation>lymph node | [no data]           | ChristophKlein | manual manipulation cryo-conserved adhesion slides      |
| gp100+ DCC_manual                   | MM15-127>Lymph node>LN           | [no data]           | ChristophKlein | manual manipulation                                     |
| cell from patient derived cell line | MM15-127>Lymph node>LN           | [no data]           | ChristophKlein |                                                         |
| gp100+ DCC                          | MM15-127>Lymph node>LN           | [no data]           | ChristophKlein | manual manipulation cryo-conserved adhesion slides      |
| CD31+ control cell                  | MM15-127>Lymph node>LN           | [no data]           | ChristophKlein | cryo-conserved adhesion slides manual manipulation      |
| NC                                  | MM16-423>Blood>blood             | 2017-09-18 00:00:00 | ChristophKlein |                                                         |
| circulating tumor cell              | MM16-423>Blood>blood             | 2017-09-18 00:00:00 | ChristophKlein | from cryo-conserved adhesion slides manual manipulation |
| B cells                             | MM16-412>blood>blood             | [no data]           | ChristophKlein | manual manipulation from cell suspension                |
| T cells                             | MM16-412>blood>blood             | [no data]           | ChristophKlein | manual manipulation from cell suspension                |
| B cell                              | MM16-412>blood>blood             | [no data]           | ChristophKlein | manual manipulation from cell suspension                |
| disseminated cancer cell            | MM16-412>metastasis>meta3        | 2016-05-17 00:00:00 | ChristophKlein | manual manipulation from cryo-conserved adhesion slides |
| disseminated cancer cell            | MM16-412>lymph node>lymph node   | 2016-05-17 00:00:00 | ChristophKlein | manual manipulation from cryo-conserved adhesion slides |

**Supplemental Figure19.** Separation events

Individuals

Sampling events

Samples

Separation events

Cells/Bulks

Plates

Separation event - documenting the separation of said sample into individual single cells. This can be done via FACS, documenting the related markers, via Laser capture, documenting the related coordinates or via more random tissue separation protocols (documenting only the protocol).

Add sampling event

Add FACS sampling event

Add Laser Capture sampling event

Sampling event editing form

Name:

YUCLAT-AX 09-1058 - M

Extraction:

YUCLAT>YUCLAT-AX 09-1058 - Metastasis 4>YUCLAT - Metastasis 4

Date:

2014-03-03

User:

Rivka

Comment:

Attachment:

Browse...

No file selected.

OK

Cancel

|                                       |                                                               |                     |            |                                          |
|---------------------------------------|---------------------------------------------------------------|---------------------|------------|------------------------------------------|
| CellCelector                          | Z>YUCLAT- Metastasis 2                                        |                     |            |                                          |
| YUCLAT 08-707 - Met1 CellCelector     | YUCLAT>YUCLAT 08-707 - Metastasis 1>YUCLAT - Metastasis 1     | 2014-01-23 00:00:00 | Michal     |                                          |
| YUCLAT-AX 09-1058 - Met4 CellCelector | YUCLAT>YUCLAT-AX 09-1058 - Metastasis 4>YUCLAT - Metastasis 4 | 2014-03-03 00:00:00 | Rivka      |                                          |
| YUCLAT-2 09-1008- Met3 CellCelector   | YUCLAT>YUCLAT 09-1008 -Metastasis 3>YUCLAT - Metastasis 3     | 2014-03-05 00:00:00 | Rivka      |                                          |
| YUCLAT 09-1182 PBL CellCelector       | YUCLAT>YUCLAT 09-1182 - PBL>YUCLAT - PBL                      | 2014-02-27 00:00:00 | Rivka      |                                          |
| YUTOGS 11-2073- PBL                   | YUTOGS>YUTGOS 11-2073 - PBL>YUTOGS - PBL                      | 2013-02-20 00:00:00 | Rivka      | Done manually, isolated from whole blood |
| manual dissociation                   | TCGA-06-0128>1293>Spheroids (GSC's) of primary                | 2014-01-01 00:00:00 | ChayaBroby | Fiction                                  |

**Supplemental Figure20.**

Sampling event editing form

Individuals

Sampling events

Samples

Separation events

Cells/Bulks

Plates

Single Cells or Bulks, these can be documented one by one, in group or plate by plate.

Add Cell/Bulk

Add multiple Cells

Add Cells Plate

Add Cells Plate By Names

▼ Filters

Name

Comment

sample composition

sample status

sampling event

▼

| Name                 | Sampling                                    | Composition | Status    | Comment                                                                             |
|----------------------|---------------------------------------------|-------------|-----------|-------------------------------------------------------------------------------------|
| negative control     | MM16-423>Blood>blood>NC                     | Single Cell | [no data] | composition<br>comment:negative control                                             |
| MM17-224 LB wdh TZ9  | MM16-423>Blood>blood>circulating tumor cell | Single Cell | [no data] | Reamplification mixture at 65 and 68 °C composition<br>comment:MM17-224 LB wdh TZ9  |
| MM17-224 LB wdh TZ8  | MM16-423>Blood>blood>circulating tumor cell | Single Cell | [no data] | Reamplification mixture at 65 and 68 °C composition<br>comment:MM17-224 LB wdh TZ8  |
| MM17-224 LB wdh TZ7  | MM16-423>Blood>blood>circulating tumor cell | Single Cell | [no data] | Reamplification mixture at 65 and 68 °C composition<br>comment:MM17-224 LB wdh TZ7  |
| MM17-224 LB wdh TZ5  | MM16-423>Blood>blood>circulating tumor cell | Single Cell | [no data] | Reamplification mixture at 65 and 68 °C composition<br>comment:MM17-224 LB wdh TZ5  |
| MM17-224 LB wdh TZ2  | MM16-423>Blood>blood>circulating tumor cell | Single Cell | [no data] | Reamplification mixture at 65 and 68 °C composition<br>comment:MM17-224 LB wdh TZ2  |
| MM17-224 LB wdh TZ1  | MM16-423>Blood>blood>circulating tumor cell | Single Cell | [no data] | Reamplification mixture at 65 and 68 °C composition<br>comment:MM17-224 LB wdh TZ1  |
| MM17-224 LB wdh TZ12 | MM16-423>Blood>blood>circulating tumor cell | Single Cell | [no data] | Reamplification mixture at 65 and 68 °C composition<br>comment:MM17-224 LB wdh TZ12 |
| MM17-224 LB wdh TZ11 | MM16-423>Blood>blood>circulating tumor cell | Single Cell | [no data] | Reamplification mixture at 65 and 68 °C composition<br>comment:MM17-224 LB wdh TZ11 |

**Supplemental Figure21.**

Cell composition documentation: single cell or bulk

Individuals

Sampling events

Samples

Separation events

Cells/Bulks

Plates

Single Cells or Bulks, these can be documented one by one, in group or plate by plate.

Add Cell/Bulk

Add multiple Cells

Add Cells Plate

Add Cells Plate By Names

Filters

Name

sampling event

| Name                    | Comment                                                                                   |
|-------------------------|-------------------------------------------------------------------------------------------|
| negative control        | composition<br>comment:negative control                                                   |
| MM17-224 LB<br>wdh TZ9  | Reamplification mixture at<br>65 and 68 °C composition<br>comment:MM17-224 LB<br>wdh TZ9  |
| MM17-224 LB<br>wdh TZ8  | Reamplification mixture at<br>65 and 68 °C composition<br>comment:MM17-224 LB<br>wdh TZ8  |
| MM17-224 LB<br>wdh TZ7  | Reamplification mixture at<br>65 and 68 °C composition<br>comment:MM17-224 LB<br>wdh TZ7  |
| MM17-224 LB<br>wdh TZ5  | Reamplification mixture at<br>65 and 68 °C composition<br>comment:MM17-224 LB<br>wdh TZ5  |
| MM17-224 LB<br>wdh TZ2  | Reamplification mixture at<br>65 and 68 °C composition<br>comment:MM17-224 LB<br>wdh TZ2  |
| MM17-224 LB<br>wdh TZ1  | Reamplification mixture at<br>65 and 68 °C composition<br>comment:MM17-224 LB<br>wdh TZ1  |
| MM17-224 LB<br>wdh TZ12 | Reamplification mixture at<br>65 and 68 °C composition<br>comment:MM17-224 LB<br>wdh TZ12 |
| MM17-224 LB<br>wdh TZ11 | Reamplification mixture at<br>65 and 68 °C composition<br>comment:MM17-224 LB<br>wdh TZ11 |

New Cells Plate By Names

Individual:

-----

Sampling:

-----

Cells name prefix:

Comment:

Existing plate:

-----

Plate type:

-----

Plate name:

Samples in wells:

Storage box:

-----

Inner location:

Notes:

Timestamp:

Protocol:

-----

OK

Cancel

**Supplemental Figure22.** New cells plate by names editing form

Individuals

Sampling events

Samples

Separation events

Cells/Bulks

Plates

Single Cells or Bulks, these can be documented one by one, in group or plate by plate.

Add Cell/Bulk

Add multiple Cells

Add Cells Plate

Add Cells Plate By Names

▼ Filters

Name

Comment

sample composition

sample status

09-1058 - Met4 CellCelector

Name

Sampling

Composition

Status

Comment

Sample editing form

Individual:

YUCLAT

Sampling:

YUCLAT>YUCLAT-AX 09-1058 - Metastasis 4>YUCLAT - Metastasis 4>YUCLAT-AX 09-1058 - Met4 CellCelector

Name:

tube strip 10

Composition:

Single Cell

Status:

-----

Comment

composition comment:tube strip 10

Classification:

OK

Cancel

• YUCLAT>YUCLAT-AX 09-1058 - Metastasis 4>YUCLAT - Metastasis 4>YUCLAT-AX 09-1058 - Met4 CellCelector>tube strip 10

|              |                                                                                                     |             |           |                                  |
|--------------|-----------------------------------------------------------------------------------------------------|-------------|-----------|----------------------------------|
| tube strip 9 | 09-1058 - Metastasis 4>YUCLAT - Metastasis 4>YUCLAT-AX 09-1058 - Met4 CellCelector                  | Single Cell | [no data] | composition comment:tube strip 9 |
| tube strip 8 | YUCLAT>YUCLAT-AX 09-1058 - Metastasis 4>YUCLAT - Metastasis 4>YUCLAT-AX 09-1058 - Met4 CellCelector | Single Cell | [no data] | composition comment:tube strip 8 |

**Supplemental Figure23.**

Example of YUCLAT cells documentation

Reference sequences for this loci is created for all possible STR length (3~35 repeats of AC in this case)

[illegible]

**Supplemental Figure24.**

### Example of reference sequences for STR loci

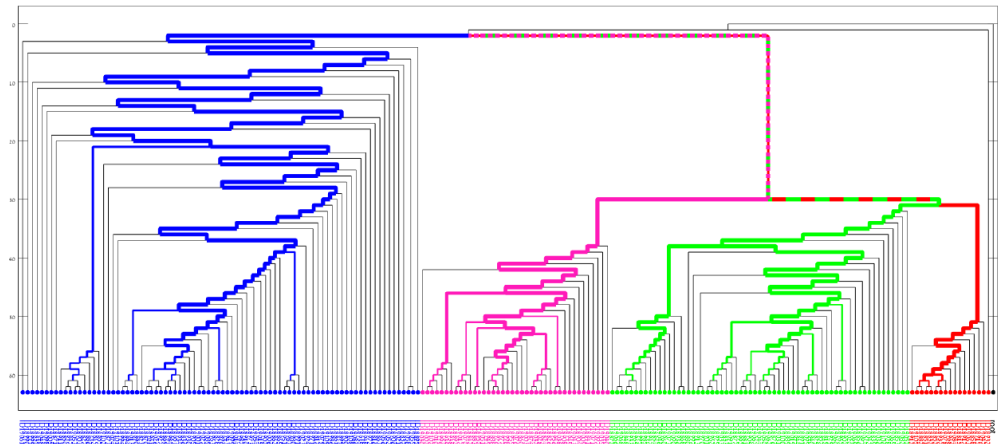

**Supplemental Figure25.**

Sanity check of cell lineage discovery platform  
Four colors presents four different individuals

- Biezuner T, Spiro A, Raz O, Amir S, Milo L, Adar R, Chapal-Ilani N, Berman V, Fried Y, Ainbinder E et al. 2016. A generic, cost-effective, and scalable cell lineage analysis platform. *Genome Res* **26**: 1588-1599.
- Bruce Budowle TRM, Stephen J. Niezgoda and Barry L. Brown. CODIS and PCR-Based Short Tandem Repeat Loci: Law Enforcement Tools.
- Carlson KD, Sudmant PH, Press MO, Eichler EE, Shendure J, Queitsch C. 2015. MIPSTR: a method for multiplex genotyping of germline and somatic STR variation across many individuals. *Genome Res* **25**: 750-761.
- Duitama J, Zablotzskaya A, Gemayel R, Jansen A, Belet S, Vermeesch JR, Verstrepen KJ, Froyen G. 2014. Large-scale analysis of tandem repeat variability in the human genome. *Nucleic Acids Res* **42**: 5728-5741.
- Guilmatre A, Highnam G, Borel C, Mittelman D, Sharp AJ. 2013. Rapid multiplexed genotyping of simple tandem repeats using capture and high-throughput sequencing. *Hum Mutat* **34**: 1304-1311.
- Shlush LI, Chapal-Ilani N, Adar R, Pery N, Maruvka Y, Spiro A, Shouval R, Rowe JM, Tzukerman M, Bercovich D et al. 2012. Cell lineage analysis of acute leukemia relapse uncovers the role of replication-rate heterogeneity and microsatellite instability. *Blood* **120**: 603-612.
