# Supplementary material for: Retrospective cell lineage reconstruction in Humans using short tandem repeats
Source: bioRxiv or medRxiv preprint supplement (doi:10.1101/191296), 2020-10-19
Supplement: Supplementary file [file 191296-2.pdf]

## Supplemental Information:

### Summary of STRs target genotyping protocols

As listed in Supplemental Table1, several protocols have been developed for target genotyping STRs. Four of them were focus on bulk DNA: CODIS<sup>1</sup> was based on multiplex PCR and capillary electrophoresis, Guilmatre et al <sup>2</sup> was based on array capture and NGS, Jorge Duitama et al<sup>3</sup> was based on RNA probe capture and NGS, Carlson et al<sup>4</sup> was based on MIPs and NGS. Two of them were focus on single cell WGA DNA, Shlush et al<sup>5</sup> was based on multiplex PCR and capillary electrophoresis, Biezuner et al<sup>6</sup> was based on Access Array and NGS.

| Tissue              | Template | Target Enrichmet | Calling Method             | Majority STR Type | Targets | Purpose                | Refs |
|---------------------|----------|------------------|----------------------------|-------------------|---------|------------------------|------|
| human blood         | Bulk     | multiplex PCR    | Capillary Electrophoresis  | hexa-             | ~20     | Forensic               | 1    |
| Human               | Bulk     | Array capture    | Next Generation Sequencing | all types         | 7851    | Mutation Discovery     | 2    |
| human blood         | Bulk     | RNA Probes       | Next Generation Sequencing | tri- and longer   | 10764   | Mutation Discovery     | 3    |
| A.thaliana          | Bulk     | MIPs             | Next Generation Sequencing | tri- and hexa-    | 102     | Evolution phylogeny    | 4    |
| human leukemia      | scWGA    | multiplex PCR    | Capillary Electrophoresis  | di-               | 128     | Lineage Reconstruction | 5    |
| human cancer        | scWGA    | Access Array     | Next Generation Sequencing | di-               | ~2000   | Lineage Reconstruction | 6    |
| human cancer/normal | scWGA    | duplex MIPs      | Next Generation Sequencing | di-, mono-        | ~10,000 | Lineage Reconstruction |      |

Supplemental Table1. STR capture methods summary

### Quality control step used in duplex MIPs preparation.

The size of duplex MIPs precursor is ~150bp. Duplex MIPs precursors were first amplified by 20 cycle PCR and further digested by MlyI (NEB) in order to create a ready-to-run duplex MIPs. Expected size for precursor amplification product is ~150bp and following digestion, the size of ready-to-run duplex MIPs is ~105bp.

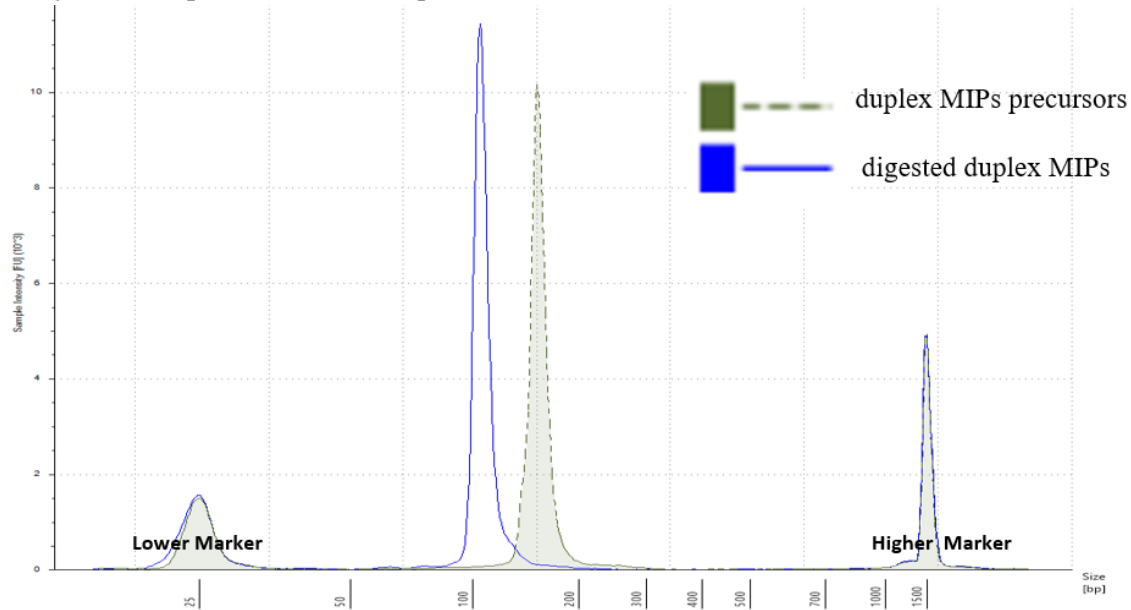

Supplemental Figure1: The size of duplex MIPs precursor and the digested duplex MIPs | The dashed green peak in the middle is duplex MIPs precursors; the solid blue peak in the middle is duplex MIPs.

### An example of Unique Molecular Identifier (UMI) read counts in the MiseqR33

Samples from MiseqR33 was analyzed. All 64 different UMIs were detected in all the samples. The sample with barcodes number 743 from MiseqR33 was shown as an example. The reads mapping to their reference targets were collected and UMIs were counted by reads contained this UMI. Counts ranking from high to low by UMI compositions was shown in Sup. Fig2. The counts of UMI bases of this sample: 'T': 17658, 'A': 11363, 'G': 10063, 'C': 8060, 'N': 28, biased towards 'T'.



### The calibration of duplex MIPs pipeline.

Three major steps: hybridization, gap-filling, digestion in the MIPs capture pipeline were calibrated in 18 different conditions. Hybridization were tested in 2, 4, 18 hours; Gap filling were tested in 1, 2, 4 hours; while the Digestion in 1, 2 hours(Data from MiseqR31, MiseqR32, and MiseqR33).

| ProbeType | DNA  | Hyb(hr) | Gap(hr) | Dig(hr) | TotalReads | Total Success | Success Rate | Loci>0 | Loci>4 | Loci>9 |
|-----------|------|---------|---------|---------|------------|---------------|--------------|--------|--------|--------|
| OM6       | Hela | 2       | 1       | 1       | 91805      | 18568         | 20%          | 6568   | 854    | 121    |
| OM6       | Hela | 2       | 1       | 1       | 115167     | 23632         | 21%          | 7293   | 1322   | 243    |
| OM6       | Hela | 2       | 1       | 2       | 121728     | 71250         | 59%          | 8892   | 4125   | 1770   |
| OM6       | Hela | 2       | 1       | 2       | 114540     | 71036         | 62%          | 9229   | 4508   | 1960   |
| OM6       | Hela | 2       | 2       | 1       | 199923     | 39214         | 20%          | 8365   | 2536   | 694    |
| OM6       | Hela | 2       | 2       | 1       | 195185     | 79740         | 41%          | 9451   | 4911   | 2267   |
| OM6       | Hela | 2       | 2       | 2       | 100563     | 56274         | 56%          | 8787   | 3641   | 1337   |
| OM6       | Hela | 2       | 2       | 2       | 88212      | 51594         | 58%          | 8605   | 3247   | 1098   |
| OM6       | Hela | 2       | 4       | 1       | 151143     | 48412         | 32%          | 8854   | 3198   | 997    |
| OM6       | Hela | 2       | 4       | 1       | 141481     | 45520         | 32%          | 8390   | 3000   | 902    |
| OM6       | Hela | 2       | 4       | 2       | 157111     | 84307         | 54%          | 9506   | 5147   | 2480   |
| OM6       | Hela | 2       | 4       | 2       | 129168     | 88406         | 68%          | 9498   | 5333   | 2611   |
| OM6       | Hela | 4       | 1       | 1       | 212479     | 111956        | 53%          | 10162  | 6138   | 3348   |
| OM6       | Hela | 4       | 1       | 1       | 234372     | 133546        | 57%          | 10269  | 6808   | 4101   |
| OM6       | Hela | 4       | 1       | 2       | 129933     | 52523         | 40%          | 8995   | 3295   | 1127   |
| OM6       | Hela | 4       | 1       | 2       | 141878     | 62774         | 44%          | 9369   | 4097   | 1566   |
| OM6       | Hela | 4       | 2       | 1       | 291192     | 151906        | 52%          | 10468  | 7360   | 4635   |
| OM6       | Hela | 4       | 2       | 1       | 261932     | 154769        | 59%          | 10503  | 7442   | 4729   |
| OM6       | Hela | 4       | 2       | 2       | 2279390    | 960410        | 42%          | 8474   | 8086   | 7674   |
| OM6       | Hela | 4       | 2       | 2       | 158861     | 119662        | 75%          | 10064  | 6275   | 3624   |
| OM6       | Hela | 4       | 4       | 1       | 258732     | 93063         | 36%          | 10062  | 5689   | 2785   |
| OM6       | Hela | 4       | 4       | 1       | 175854     | 107480        | 61%          | 10156  | 6287   | 3512   |
| OM6       | Hela | 4       | 4       | 2       | 207550     | 156801        | 76%          | 10395  | 7339   | 4781   |
| OM6       | Hela | 4       | 4       | 2       | 146975     | 112963        | 77%          | 10028  | 6267   | 3519   |
| OM6       | Hela | 18      | 1       | 1       | 108935     | 75979         | 70%          | 9946   | 5124   | 2297   |
| OM6       | Hela | 18      | 1       | 1       | 281556     | 218901        | 78%          | 10831  | 8540   | 6092   |
| OM6       | Hela | 18      | 1       | 2       | 229945     | 82983         | 36%          | 9935   | 5247   | 2571   |
| OM6       | Hela | 18      | 1       | 2       | 161878     | 80571         | 50%          | 9948   | 5148   | 2376   |
| OM6       | Hela | 18      | 2       | 1       | 112089     | 80908         | 72%          | 10092  | 5458   | 2587   |
| OM6       | Hela | 18      | 2       | 1       | 191178     | 154354        | 81%          | 10649  | 7833   | 5016   |
| OM6       | Hela | 18      | 2       | 2       | 97018      | 39422         | 41%          | 8628   | 2692   | 893    |
| OM6       | Hela | 18      | 2       | 2       | 111756     | 57099         | 51%          | 9508   | 4006   | 1576   |
| OM6       | Hela | 18      | 4       | 1       | 105243     | 87278         | 83%          | 10100  | 5780   | 2814   |
| OM6       | Hela | 18      | 4       | 1       | 240644     | 200976        | 84%          | 10795  | 8679   | 6224   |
| OM6       | Hela | 18      | 4       | 2       | 223929     | 95769         | 43%          | 10204  | 6009   | 3099   |
| OM6       | Hela | 18      | 4       | 2       | 183300     | 145216        | 79%          | 10607  | 7781   | 4816   |

Supplemental Table 3. Calibration of duplex MIPs process: Hyb -Gap-Dig | Hyb means hybridization, the first step in duplex MIPs capture protocol. Gap means gap filing, the second step. Dig is the third step, linear DNA digestion. Green highlighted the protocol we chosen as standard. The success rate was calculated as: mapped reads/total reads. The loci captured were defined as loci that has at least 1 mapped read.

| BluePippin Size (bp) | Name          | TotalReads | Total Success | Success Rate | Loci >0 Captured |
|----------------------|---------------|------------|---------------|--------------|------------------|
| 300                  | W151020 p2-C9 | 61816      | 57226         | 92.6%        | 7944             |
| 240-340              | W151020 p2-C9 | 144518     | 130517        | 90.3%        | 9783             |
| 270-310              | W151020 p2-C9 | 87924      | 82158         | 93.4%        | 8791             |
| 300                  | H1- 090215-B3 | 87665      | 83768         | 95.6%        | 3075             |
| 240-340              | H1- 090215-B3 | 164359     | 155680        | 94.7%        | 4046             |
| 270-310              | H1- 090215-B3 | 122252     | 117106        | 95.8%        | 3574             |
| 300                  | H1- 090215-B3 | 85631      | 81251         | 94.9%        | 2891             |
| 240-340              | H1- 090215-B3 | 178585     | 168311        | 94.2%        | 3985             |
| 270-310              | H1- 090215-B3 | 123557     | 117945        | 95.5%        | 3411             |
| 300                  | H1- 090215-B6 | 129546     | 123914        | 95.7%        | 5568             |
| 240-340              | H1- 090215-B6 | 387493     | 368533        | 95.1%        | 6850             |
| 270-310              | H1- 090215-B6 | 213020     | 203982        | 95.8%        | 6209             |
| 300                  | H1- 090215-E9 | 114190     | 109002        | 95.5%        | 5194             |
| 240-340              | H1- 090215-E9 | 460648     | 436100        | 94.7%        | 6728             |
| 270-310              | H1- 090215-E9 | 137124     | 131168        | 95.7%        | 5569             |
| 300                  | H1- 090215-A1 | 77196      | 73307         | 95.0%        | 5230             |
| 240-340              | H1- 090215-A1 | 154987     | 146026        | 94.2%        | 6327             |
| 270-310              | H1- 090215-A1 | 120505     | 114812        | 95.3%        | 5882             |
| 300                  | H1- 090215-F5 | 14620      | 13535         | 92.6%        | 3706             |
| 240-340              | H1- 090215-F5 | 184932     | 170304        | 92.1%        | 7744             |
| 270-310              | H1- 090215-F5 | 22392      | 20930         | 93.5%        | 4533             |
| 300                  | PC2           | 12488      | 11149         | 89.3%        | 5004             |
| 240-340              | PC2           | 95192      | 81596         | 85.7%        | 10347            |
| 270-310              | PC2           | 9078       | 8208          | 90.4%        | 4454             |

Supplemental Table 4. Calibration of Sequencing Library Size Selection | PC2 was bulk DNA; all the other samples were single cell WGA DNA

### Calibration the impact of ratio between MIPs concentration and template DNA amount

|             |         | 1     | 2     | 3     | 4     | 5     | 6     | 7      | 8      | 9   | 10  |
|-------------|---------|-------|-------|-------|-------|-------|-------|--------|--------|-----|-----|
| Total Reads | probe   | 80nM  | 80nM  | 8nM   | 8nM   | 0.8nM | 0.8nM | 0.08nM | 0.08nM | 0nM | 0nM |
|             | HeLa    |       |       |       |       |       |       |        |        |     |     |
| A           | 2000    | 158   | 12655 | 33748 | 29465 | 14111 | 2383  | 7146   | 259    | 51  | 90  |
| B           | 1000    | 20166 | 15217 | 26525 | 24094 | 51035 | 56023 | 2941   | 3043   | 58  | 87  |
| C           | 500     | 15363 | 13718 | 13075 | 11051 | 36246 | 17843 | 1837   | 1086   | 34  | 71  |
| D           | 250     | 18666 | 12935 | 9976  | 10861 | 24819 | 20520 | 2364   | 1895   | 41  | 54  |
| E           | 100 ng  | 4959  | 6063  | 1182  | 1643  | 3682  | 4032  | 380    | 383    | 17  | 30  |
| F           | 10 ng   | 175   | 494   | 2989  | 87    | 973   | 595   | 66     | 89     | 27  | 35  |
| G           | 1 ng    | 76    | 292   | 2103  | 32    | 172   | 261   | 28     | 26     | 26  | 28  |
| H           | 0.1 ng  | 48    | 351   | 1126  | 1356  | 144   | 389   | 38     | 51     | 27  | 78  |
| I           | 0.01 ng | 122   | 56    | 1607  | 408   | 199   | 129   | 65     | 37     | 136 | 87  |
| J           | 0       | 137   | 49    | 439   | 240   | 67    | 187   | 35     | 22     | 65  | 51  |

Supplemental Table 5. Total Reads of the calibration of DNA, duplex MIPs ratio.

|         |         | 1    | 2    | 3    | 4    | 5     | 6     | 7      | 8      | 9   | 10  |
|---------|---------|------|------|------|------|-------|-------|--------|--------|-----|-----|
| Loci >0 | probe   | 80nM | 80nM | 8nM  | 8nM  | 0.8nM | 0.8nM | 0.08nM | 0.08nM | 0nM | 0nM |
|         | HeLa    |      |      |      |      |       |       |        |        |     |     |
| A       | 2000    | 127  | 4984 | 6386 | 6241 | 4346  | 1383  | 2866   | 170    | 27  | 47  |
| B       | 1000    | 6102 | 5422 | 6019 | 5815 | 6784  | 6916  | 1645   | 1644   | 20  | 39  |
| C       | 500     | 5332 | 5041 | 4670 | 4288 | 6268  | 4937  | 1076   | 685    | 10  | 25  |
| D       | 250     | 5765 | 4824 | 4109 | 4221 | 5432  | 5100  | 1242   | 1148   | 11  | 18  |
| E       | 100 ng  | 2614 | 3177 | 883  | 1056 | 1604  | 1970  | 231    | 240    | 12  | 14  |
| F       | 10 ng   | 60   | 309  | 936  | 35   | 461   | 293   | 35     | 46     | 11  | 21  |
| G       | 1 ng    | 11   | 236  | 212  | 15   | 38    | 59    | 10     | 10     | 14  | 15  |
| H       | 0.1 ng  | 13   | 274  | 30   | 20   | 18    | 38    | 23     | 18     | 13  | 29  |
| I       | 0.01 ng | 46   | 20   | 40   | 23   | 45    | 18    | 19     | 25     | 68  | 51  |
| J       | 0       | 31   | 17   | 33   | 42   | 23    | 13    | 15     | 14     | 35  | 30  |

Supplemental Table 6. Captured loci of the calibration of DNA, duplex MIPs ratio.

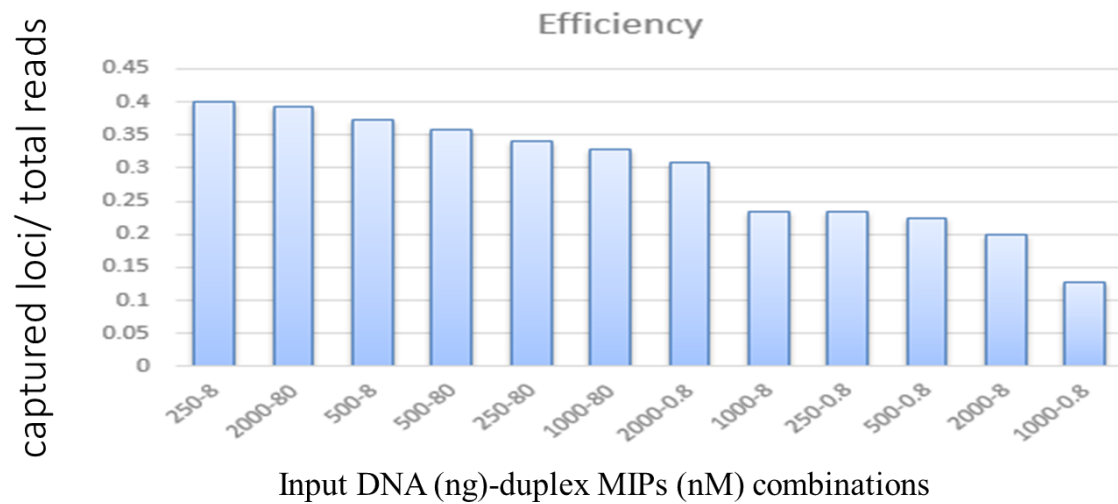

Supplemental Figure 4. Efficiency comparison between different probes: template ratio | Efficiency was calculated by captured loci/ total reads as show in Supplemental Table 5 and 6.

## Sequencing library quality control

As a sequencing library quality control step, Tape Station was applied to the libraries before and after Blue Pippin. 240~340bp range size selection setting was used on 2% V1 cassette. Two side product peaks were removed by BluePippin as shown below.

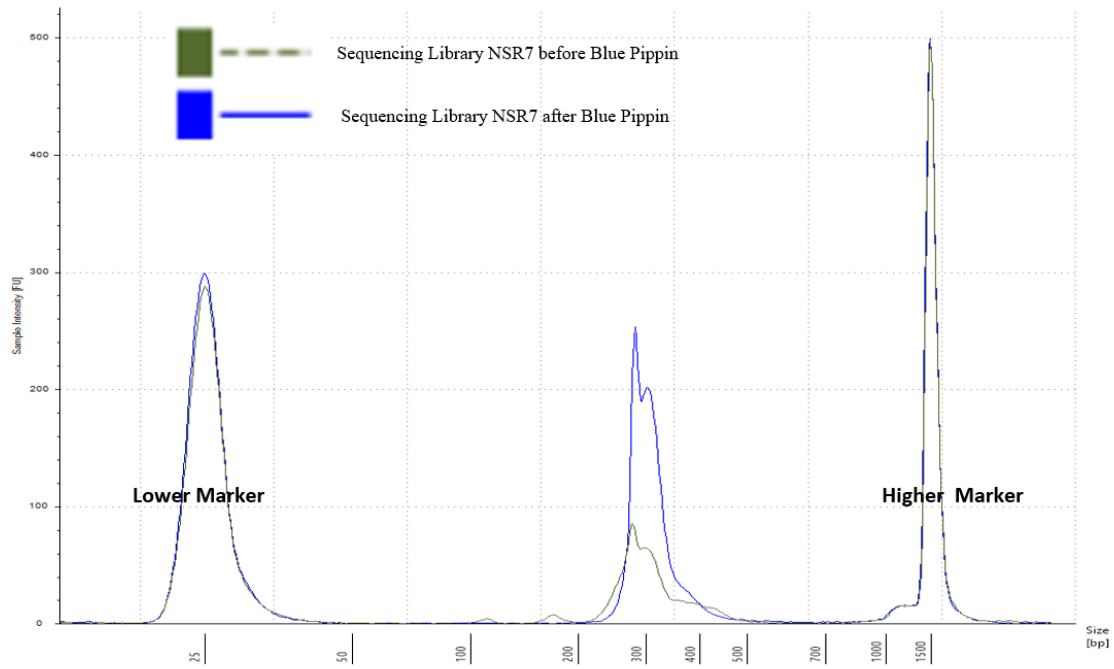

Supplemental Figure 5. Library Quality Control: Tape Station before Blue Pippin and after Blue Pippin

**General cost of duplex MIPs capture pipeline was listed below.**

The cost was calculated by 200 cells/run, WGA cost and sequencing run cost were not included.

| Reagents                                                           | Cat.No                 | Cost(\$)       | Total Volume(ul or reactions) | (ul) Volume per Reaction | (\$ Cost per Reaction |
|--------------------------------------------------------------------|------------------------|----------------|-------------------------------|--------------------------|-----------------------|
| duplex MIPs                                                        | Home made              | 2200           | 9400000                       | 1                        | 0.000234043           |
| Betaine solution 5M                                                | B0306 1VL Sigma        | 49             | 1500                          | 4                        | 0.13                  |
| ++Phusion High-Fidelity DNA Polymerase - 500 units                 | NEB-M0530L             | 424            | 250                           | 0.4                      | 0.68                  |
| Ampligase 10X Reaction Buffer 5ml                                  | A1905B EPICENTRE       | 66             | 5000                          | 2                        | 0.03                  |
| Ampligase DNA Ligase W/O Buffer 10,000U                            | A3210K EPICENTRE       | 693            | 2000                          | 1                        | 0.35                  |
| Exonuclease I (E.coli) - 15,000 units                              | NEB-M0293L             | 268            | 750                           | 0.175                    | 0.06                  |
| Exonuclease III (E.coli) - 25000 units                             | NEB-M0206L             | 236            | 250                           | 0.18                     | 0.17                  |
| ++ RecJf - 1,000 units                                             | NEB-M0264L             | 272            | 167                           | 0.1                      | 0.16                  |
| Exonuclease T - 1,250 units,                                       | NEB-M0265L             | 280            | 250                           | 0.08                     | 0.09                  |
| T7 Exonuclease - 5,000 units,                                      | NEB-M0263L             | 248            | 500                           | 0.4                      | 0.20                  |
| Lambda Exonuclease                                                 | M0262L                 | 268            | 1000                          | 0.02                     | 0.01                  |
| NEBNext Ultra II Q5 MasterMix                                      | NEB-M0544L             | 395            | 12500                         | 10                       | 0.32                  |
| MinElute PCR Purification Kit (250) '                              | QIAGEN 28006           | 594            | 250reactions                  | 2reaction/Run            | 0.02                  |
| Qubit® dsDNA HS Assay Kit,                                         | Q32854                 | 269            | 500reactions                  | 2reaction/Run            | 0.01                  |
| Agencourt Ampure XP Beads                                          | BeckmanCo ulter A63881 | 1485           | 600000                        | 16                       | 0.04                  |
| 2% Agarose, dye-free, w/ internal standards, BluePippin, 100 - 60, | BDF2010                | 475            | 50reactions                   | 1reaction/Run            | 0.05                  |
| TapeStation Screen Tap                                             | 5067-5582              | 211            | 112 reactions                 | 2reaction/Run            | 0.02                  |
| TapeStation Reagents                                               | 5067-5583              | 90.33          | 112 reactions                 | 2reaction/Run            | 0.01                  |
|                                                                    |                        |                |                               | Consumable               | 3                     |
|                                                                    | <b>Initial Cost</b>    | <b>8523.33</b> |                               | <b>Cost per Cell</b>     | <b>5.33</b>           |

Supplemental Table 8. The cost of duplex MIPs capture pipeline.

**The scalability of duplex MIPs**

Shown together with AA pipeline, the cost trend of duplex MIPs while scaling up.

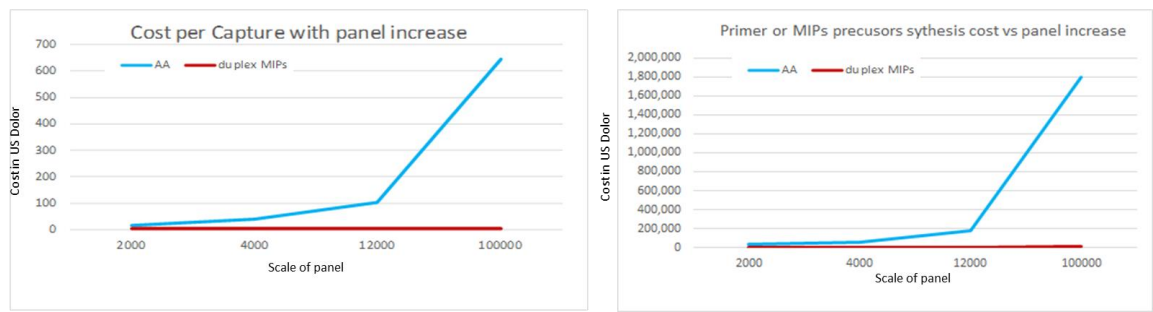

Supplemental Figure 6. Cost and Scalability between Access Array and duplex MIPs

### A schematic diagram of the computational pipeline

A new mapping strategy was replaced the one in our previous work<sup>6</sup>. Reads were aligned against a custom reference genome of all possible STR variations in the panel. This improved the computing efficiency. All the source code was available in <https://github.com/ofirr/clineage>

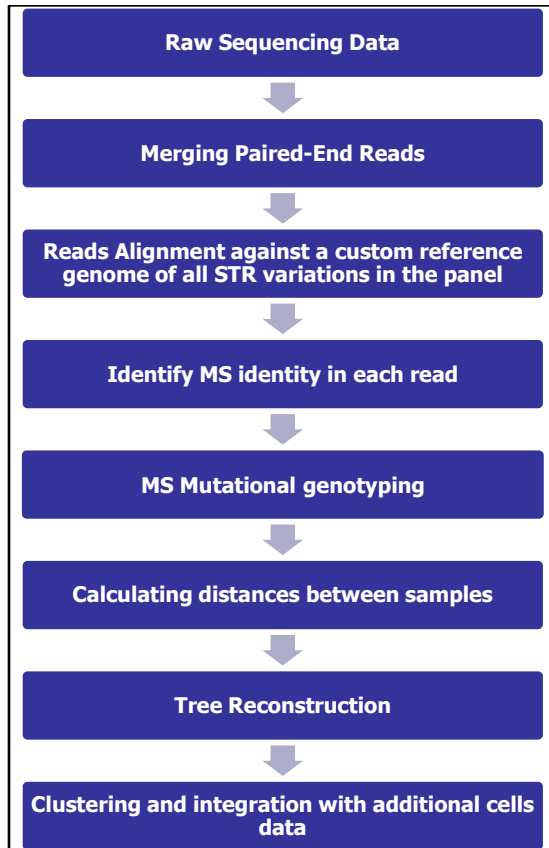

Supplemental Figure 7. A schematic diagram of the computational pipeline

1. Bruce Budowle, T.R.M., Stephen J. Niezgoda and Barry L. Brown CODIS and PCR-Based Short Tandem Repeat Loci: Law Enforcement Tools.
2. Guilmatre, A., Highnam, G., Borel, C., Mittelman, D. & Sharp, A.J. Rapid multiplexed genotyping of simple tandem repeats using capture and high-throughput sequencing. *Hum Mutat* **34**, 1304-1311 (2013).
3. Duitama, J. et al. Large-scale analysis of tandem repeat variability in the human genome. *Nucleic Acids Res* **42**, 5728-5741 (2014).
4. Carlson, K.D. et al. MIPSTR: a method for multiplex genotyping of germline and somatic STR variation across many individuals. *Genome Res* **25**, 750-761 (2015).

5. Shlush, L.I. et al. Cell lineage analysis of acute leukemia relapse uncovers the role of replication-rate heterogeneity and microsatellite instability. *Blood* **120**, 603-612 (2012).
6. Biezuner, T. et al. A generic, cost-effective, and scalable cell lineage analysis platform. *Genome Res* **26**, 1588-1599 (2016).
